# Supplementary material for: Boosting electrochemical CO2reduction to formate using SnO2/graphene oxide with amide linkages
Source: Royal Society of Chemistry journal article supplement (doi:10.1039/d1ta02780h), 2021-01-01
Supplement: d1ta02780h1.pdf [file d1ta02780h1.pdf]

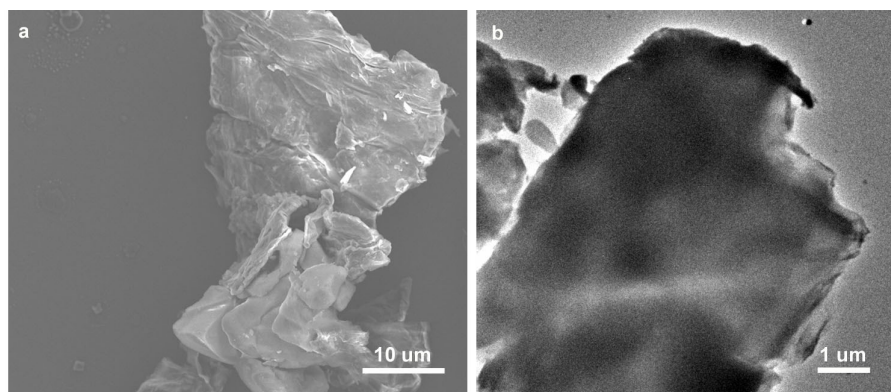

Figure S1. a-b SEM and TEM images of graphite oxide powder.

## ARTICLE

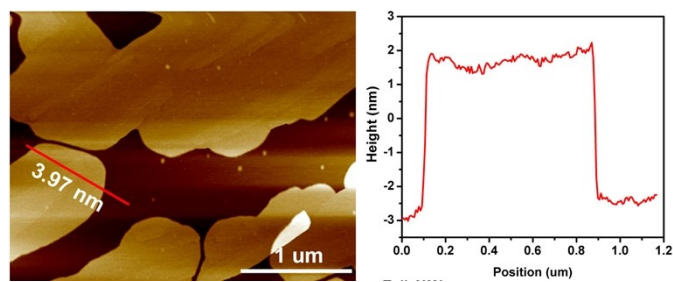

Figure S2. AFM image of tert-GO.

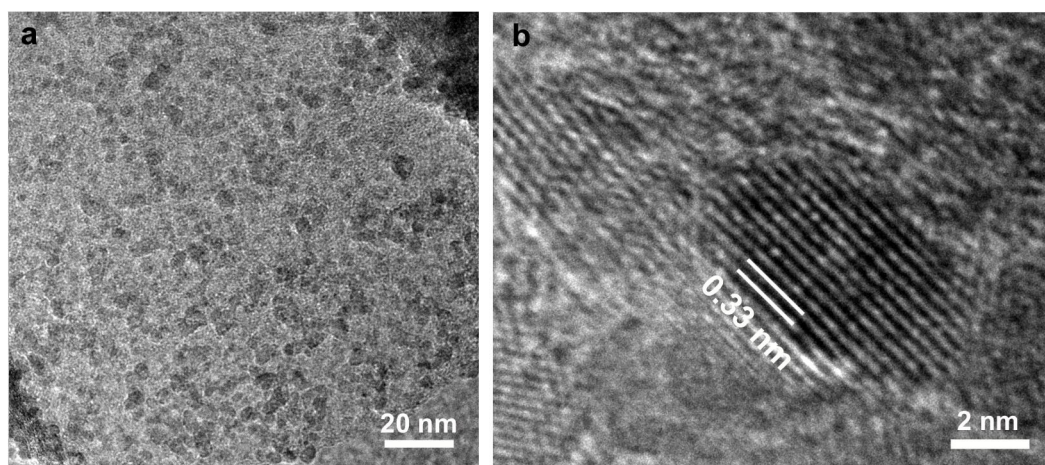

**Figure S3.** a TEM image of SnO<sub>2</sub>/tert-GO catalysts. b A higher magnification STEM image of SnO<sub>2</sub>/tert-GO.

ARTICLE

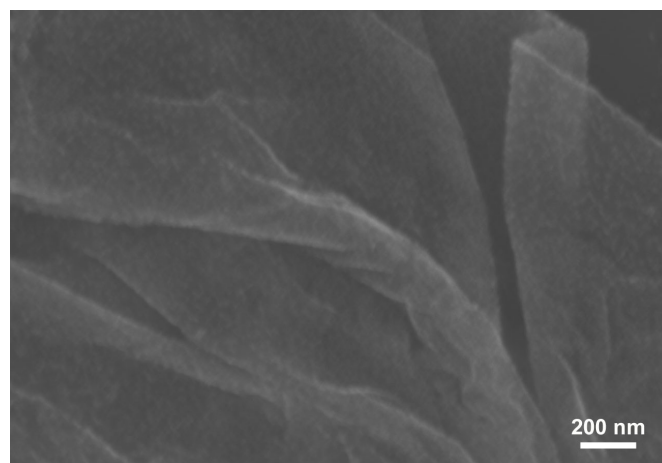

**Figure S4.** SEM image of SnO<sub>2</sub>/tert-GO.

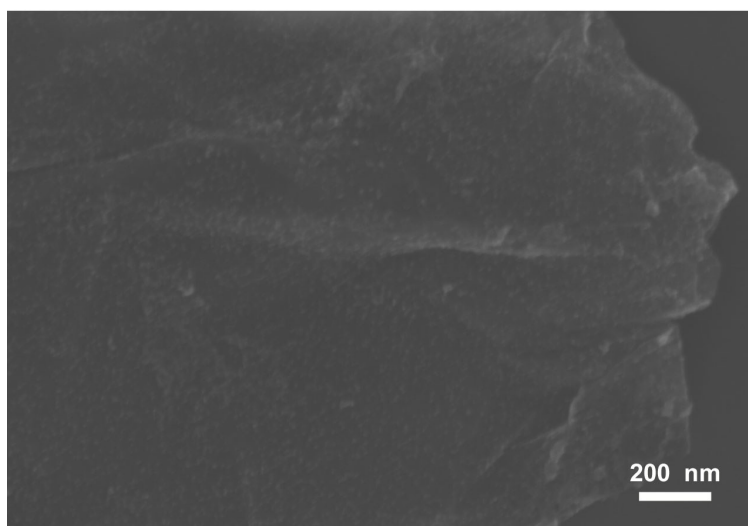

**Figure S5.** SEM image of SnO<sub>2</sub>/GO.

## ARTICLE

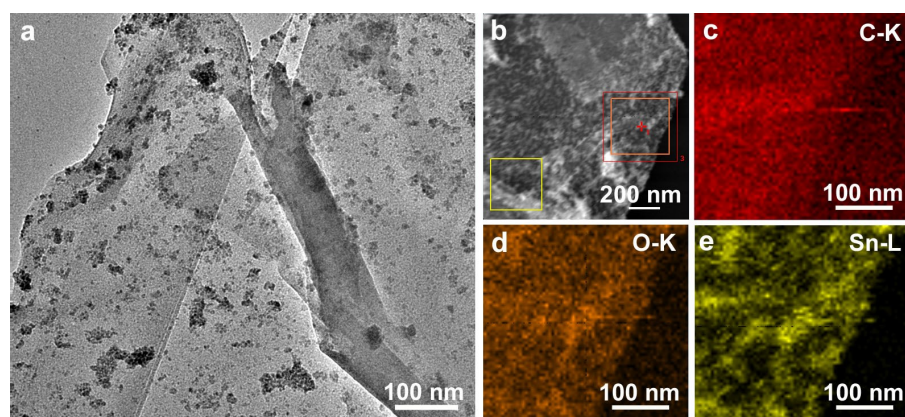

**Figure S6** a TEM bright-field image of SnO<sub>2</sub>/GO catalysts. b A higher magnification STEM image of SnO<sub>2</sub>/GO catalysts. c-e the X-EDS mappings of SnO<sub>2</sub>/GO catalysts.

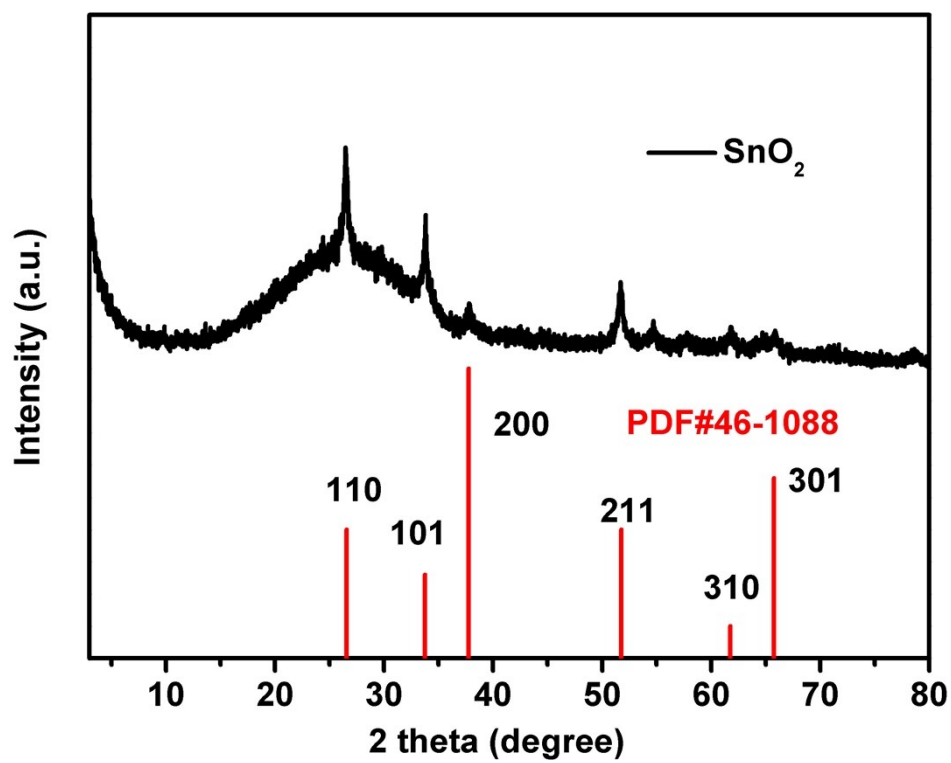

Figure S7. XRD pattern of SnO<sub>2</sub> catalyst.

ARTICLE

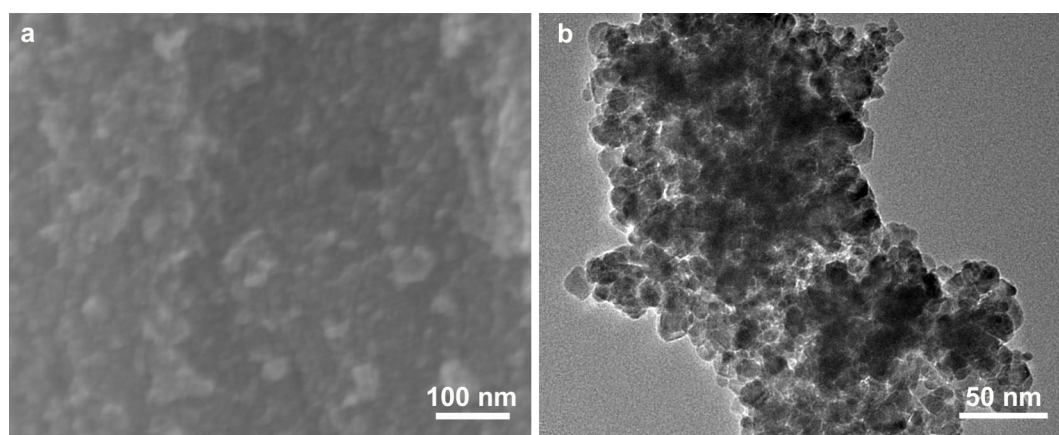

**Figure S8.** a-b SEM and TEM images of SnO<sub>2</sub>.



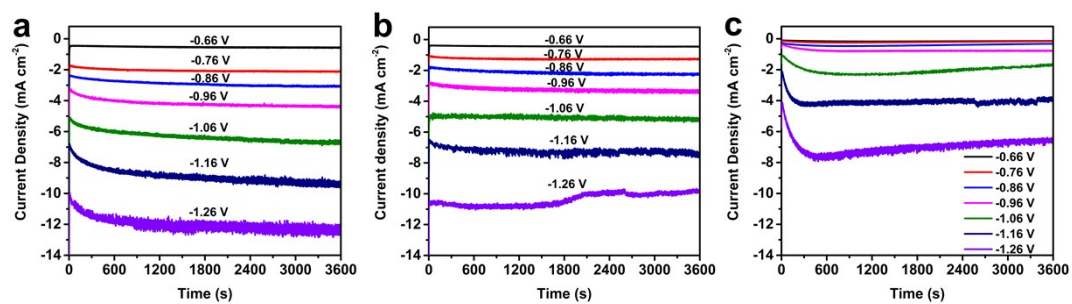

Figure S9. a-c Chronoamperometric curves of SnO<sub>2</sub>/tert-GO, SnO<sub>2</sub>/GO and SnO<sub>2</sub> at different applied potentials as indicated.

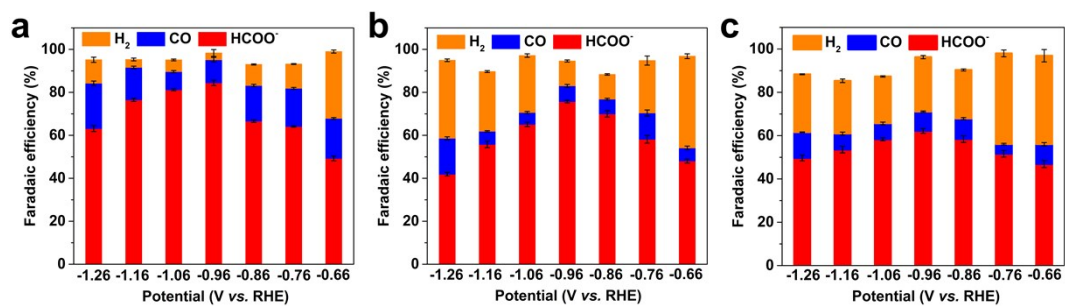

**Figure S10.** a-c HCOO<sup>-</sup>, CO and H<sub>2</sub> Faradaic efficiency for SnO<sub>2</sub>/tert-GO, SnO<sub>2</sub>/GO and SnO<sub>2</sub> at different applied potentials. During 1 h electrolysis, 0.1 M KHCO<sub>3</sub> aqueous solution electrolyte at the cathodic part was under continuously mild stir and bubbled with CO<sub>2</sub> at the speed of 20 ml min<sup>-1</sup>.

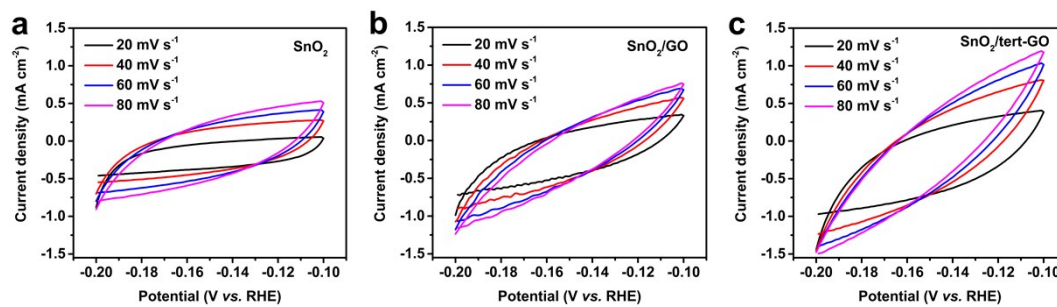

Figure S11. Cyclic voltammograms (CVs) of a) SnO<sub>2</sub>/tert-GO, b) SnO<sub>2</sub>/GO and c) SnO<sub>2</sub> between -0.2 V and -0.1 V vs. RHE in CO<sub>2</sub>-saturated 0.1 M KHCO<sub>3</sub>.

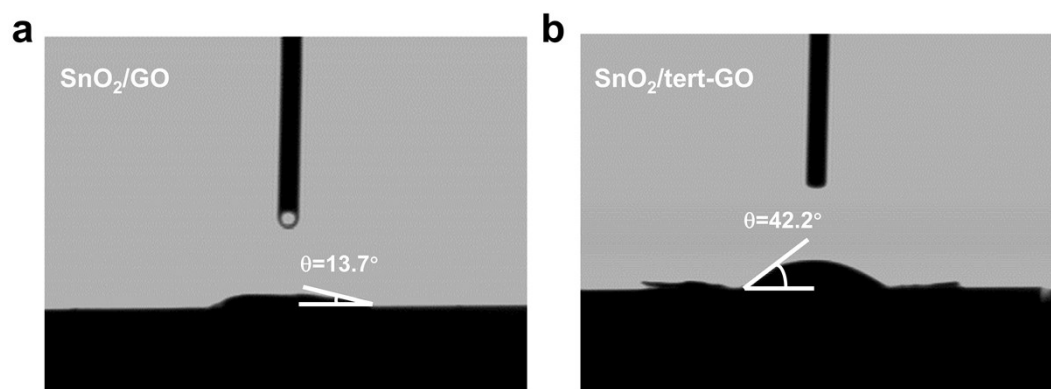

Figure S12. Contact Angle test diagrams of SnO<sub>2</sub>/GO (a), and SnO<sub>2</sub>/tert-GO (b).

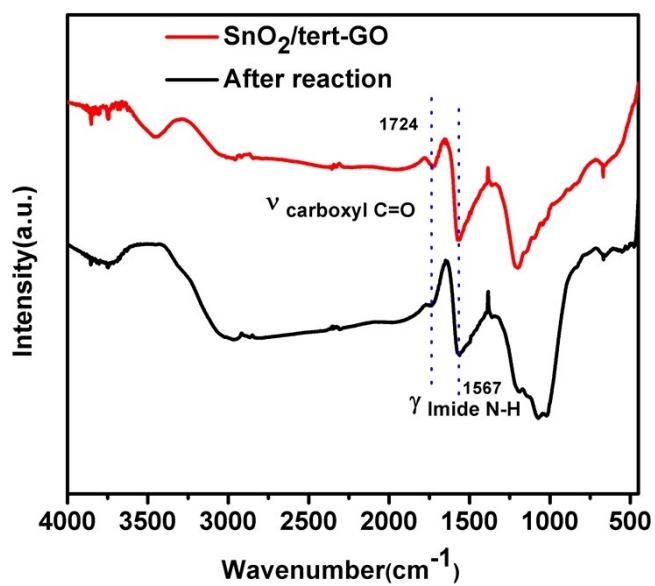

Figure S13. FTIR of SnO<sub>2</sub>/tert-GO and SnO<sub>2</sub>/tert-GO after reaction.

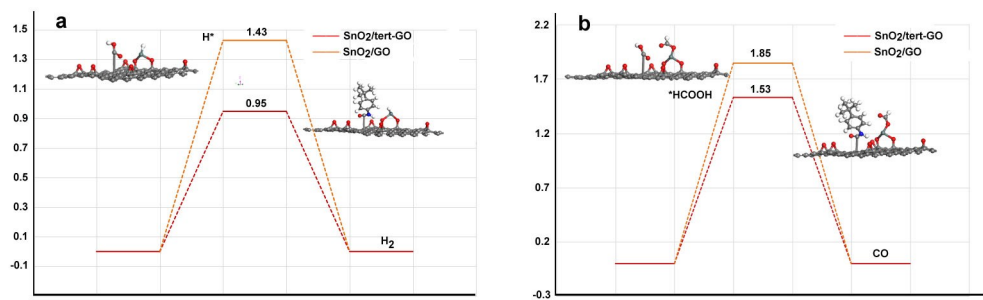

Figure S14. Theoretical calculation of conversion of CO<sub>2</sub> to CO and HER reaction

**Table S1.** Performance comparison of different metal-based electrocatalysts for CO<sub>2</sub> reduction to formate from recent literature.

| Electrocatalysts                | Electrolyte              | Formate FE <sub>max</sub> | <i>j</i> <sub>HCOO<sup>-</sup></sub> at FE <sub>max</sub> | Ref.             |
|---------------------------------|--------------------------|---------------------------|-----------------------------------------------------------|------------------|
| SnO <sub>2</sub> -tert-GO       | 0.1 M KHCO <sub>3</sub>  | 84.9%@-0.96 V vs. RHE     | 3.7 mA cm <sup>-2</sup>                                   | <b>This work</b> |
| Sn/SnOx thin flm                | 0.5 M NaHCO <sub>3</sub> | 40%@-0.7 V vs. RHE        | 1.6 mA cm <sup>-2</sup>                                   | S1               |
| Bi nanoflake                    | 0.1 M KHCO <sub>3</sub>  | ≈100%@-0.6 V vs. RHE      | 1.0 mA cm <sup>-2</sup>                                   | S2               |
| Hierarchical Bi dendrite        | 0.5 M KHCO <sub>3</sub>  | ≈89%@-0.74 V vs. RHE      | 2.4 mA cm <sup>-2</sup>                                   | S3               |
| BiOx/C                          | 0.5 M NaHCO <sub>3</sub> | 92.1%@-1.37 V vs. Ag/AgCl | 1.35 mA cm <sup>-2</sup>                                  | S4               |
| Sulfide-derived Bi              | 0.5 M NaHCO <sub>3</sub> | 84%@-0.75 V vs. RHE       | 4.2 mA cm <sup>-2</sup>                                   | S5               |
| Sn-CF1000                       | 0.1 M KHCO <sub>3</sub>  | 62%@-0.8 V vs. RHE        | 11 mA cm <sup>-2</sup>                                    | S6               |
| Nano-SnO <sub>2</sub> /graphene | 0.1 M KHCO <sub>3</sub>  | 93.6%@-1.8 V vs. SCE      | 9.5 mA cm <sup>-2</sup>                                   | S7               |
| SnO <sub>2</sub> pNWs           | 0.1 M KHCO <sub>3</sub>  | 80%@-0.8 V vs. RHE        | 4.8 mA cm <sup>-2</sup>                                   | S8               |
| Dendritic indium foams          | 0.5 M KHCO <sub>3</sub>  | 86%@-0.86 V vs. RHE       | 5.0 mA cm <sup>-2</sup>                                   | S9               |

## ARTICLE

## References

- [S1] Y. Chen, M. W. Kanan, *J. Am. Chem. Soc.* 2012, 134, 1986.
- [S2] S. Kim, W. J. Dong, S. Gim, W. Sohn, J. Y. Park, C. J. Yoo, H. W. Jang, J. L. Lee, *Nano Energy* 2017, 39, 44.
- [S3] J. H. Koh, D. H. Won, T. Eom, N. K. Kim, K. D. Jung, H. Kim, Y. J. Hwang, B. K. Min, *ACS Catal.* 2017, 7, 5071.
- [S4] C. W. Lee, J. S. Hong, K. D. Yang, K. Jin, J. H. Lee, H. Y. Ahn, H. Seo, N. E. Sung, K. T. Nam, *ACS Catal.* 2018, 8, 931.
- [S5] Y. Zhang, F. Li, X. Zhang, T. Williams, C. D. Easton, A. M. Bond, J. Zhang, *J. Mater. Chem. A* 2018, 6, 4714.
- [S6] Y. Zhao, J. Liang, C. Wang, J. Ma, G. G. Wallace, *Adv. Energy Mater.* 2018, 8, 1702524.
- [S7] S. Zhang, P. Kang, T. J. Meyer, *J. Am. Chem. Soc.* 2014, 136, 1734.
- [S8] B. Kumar, V. Atla, J. P. Brian, S. Kumari, T. Q. Nguyen, M. Sunkara, J. M. Spurgeon, *Angew. Chem., Int. Ed.* 2017, 56, 3645.
- [S9] Z. Xia, M. Freeman, D. Zhang, B. Yang, L. Lei, Z. Li, Y. Hou, *ChemElectroChem* 2018, 5, 253.
